# Supplementary material for: Prolonged cancer treatment may affect return to work on gynecologic cancer
Source: Research Square preprint supplement (doi:10.21203/rs.3.rs-4302349/v1), 2024-05-10
Supplement: Supplementary file 1 [file 38ae69fe624b6606f07c9688.xlsx]

## Sheet: Sheet1
	Table II. Logistic regression analysis for more than 100 days to period of sick leave
			Univariate analysis				Multivariate analysis
	Period	Exp(B)	95%Cl	P-value		Exp(B)	95%Cl	P-value
	Age (>55 years)	1.851	0.824-4.161	0.136		1.185	0.422-3.323	0.747
	BMI (≥30)	0.822	0.266-2.540	0.734		1.019	0.235-4.416	0.98
	Marital status (None)	1.069	0.429-2.665	0.886		2.13	0.453-10.005	0.338
	Children (None children)	1.054	0.478-2.323	0.897		0.854	0.212-3.445	0.825
	Cancer site (Ovarian cancer)	0.949	0.363-2.486	0.916		0.334	0.093-1.196	0.092
	Stage (Advanced stage)	3.643	1.548-8.570	0.003*		1.511	0.482-4.734	0.479
	Employment pattern (Non regularly-employment)	1.468	0.692-3.114	0.317		1.284	0.458-3.598	0.635
	The work days per week (≤ 3days/week)	1.183	0.244-5.739	0.835		2.399	0.309-18.647	0.403
	Work time per day (≤5hours/days)	0.657	0.185-2.327	0.515		0.141	0.022-0.902	0.039*
	Workplace number of peoples (≤ Five peoples)	0.763	0.274-2.125	0.605		0.872	0.244-3.120	0.833
	Person income (< 1,030,000 yen)	2.5	1.094-5.712	0.030*		4.317	1.213-15.362	0.024*
	Household income (< 3,000,000 yen)	1.301	0.453-3.737	0.625		0.676	0.152-3.003	0.606
	Adverse effect after treatment	2.884	1.300-6.398	0.009*		2.874	1.074-7.693	0.036*
	Surgery plus chemotherapy (≥6 cycles)	11.209	4.868-25.809	<0.001*		16.997	5.518-52.352	<0.001*
	Abbrevations: BMI ; body mass index
