# Supplementary material for: Prolonged cancer treatment may affect return to work on gynecologic cancer
Source: Research Square preprint supplement (doi:10.21203/rs.3.rs-4302349/v1), 2024-05-10
Supplement: Supplementary file 2 [file c420411faf1f631dac2e7440.xlsx]

## Sheet: Sheet1
	Table I. Patient characteristics
	Age at diagnosis	Median, 47.7 Range；20-63
		Numbers	(%)
	BMI
	<18.5	22	10.6
	18.5-24.9	121	58.5
	25.0-29.9	35	16.9
	30.0-34.9	21	10.1
	35.0-	8	3.9
	Marry
	Yes	165	79.7
	No	42	20.3
	Children
	Yes	140	67.6
	No	67	32.4
	Cancer site
	Cervical cancer	70	33.8
	Endometrial cancer	91	44
	Ovarian cancer	39	18.8
	Other cancers	7	3.4
	Stage
	Early	175	84.5
	Advanced	32	15.5
	Treatment
	Surgery (without LND)	64	30.9
	Surgery (with LND)	41	19.8
	Surgery + Chemotherpy (< 6 courses)	21	10.1
	Surgery + Chemotherpy (≥6 courses)	41	19.8
	Surgery+ Radiation (included CCRT)	19	9.2
	Radiation (included CCRT)	21	10.1
	The work days per week
	≤ 3days/week	11	5.3
	4days/week	22	10.6
	5days/week	154	74.3
	≥ 6 day/week	20	9.7
	Work time per day
	≤5hours/days	26	12.6
	6-8hours/days	104	50.2
	≥ 8hours/days	77	37.2
	Workplace number of peoples
	≤ 5peoples	38	18.4
	6-10 peoples	31	15
	11-20 peoples	20	9.7
	21-30 peoples	24	11.6
	31-50 peoples	18	8.7
	> 50 peoples	76	36.7
	Person income (10,000yen)
	<103	40	19.3
	103-149	36	17.4
	150-299	61	29.5
	300-499	51	24.6
	≥ 500	19	9.2
	Household income (10,000yen)
	<300	26	12.6
	300-499	47	22.7
	500-699	65	31.4
	700-999	48	23.2
	1,000-1,499	16	7.7
	≥ 1,500	5	2.4
	Abbrevations: BMI; body mass index, LND; Lymph node dissection
	CCRT; concurrent chemoradiotherapy.
